1 Full title: Mapping the Association between Mental Health and  
2 People's Perceived and Actual Ability to Practice Hygiene-  
3 Related Behaviours in Humanitarian and Pandemic Crises: A  
4 Scoping Review

5 Short title: Mental Health and Handwashing

6

7 Emily Yasmin Ghassemi<sup>1</sup>, Astrid Hasund Thorseth<sup>1\*</sup>, Karine Le Roch<sup>2</sup>, Thomas Heath<sup>2</sup>, Sian  
8 White<sup>1</sup>

9 <sup>1</sup> Department of Disease Control, Faculty of Infectious and Tropical Diseases, London School  
10 of Hygiene & Tropical Medicine, London, United Kingdom

11 <sup>2</sup> Action contre la Faim, Paris, France

12

13 \* Corresponding author

14 E-mail: [astrid.thorseth@lshtm.ac.uk](mailto:astrid.thorseth@lshtm.ac.uk) (AHT)

15

16

NOTE: This preprint reports new research that has not been certified by peer review and should not be used to guide clinical practice.

## 17 **Abstract**

18 Humanitarian crises such as disease outbreaks, conflict and displacement and natural disasters  
19 affect millions of people primarily in low- and middle-income countries. Here, they often reside  
20 in areas with poor environmental health conditions leading to an increased burden of infectious  
21 diseases such as diarrheal and respiratory infections. Water, sanitation, and hygiene behaviours  
22 are critical to prevent such infections and deaths.

23 A scoping review was conducted to map out what is known about the association between three  
24 mental health issues and people's perceived and actual ability to practice hygiene-related  
25 behaviours, particularly handwashing, in humanitarian and pandemic crises. Published and  
26 grey literature was identified through database searches, humanitarian-relevant portals, and  
27 consultations with key stakeholders in the humanitarian sector.

28 25 publications were included, 21 were peer-reviewed published articles and four were grey  
29 literature publications. Most of the studies were conducted in China (n=12) and most were  
30 conducted in a pandemic outbreak setting (n=20). Six studies found a positive correlation  
31 between handwashing and anxiety where participants with higher rates of anxiety were more  
32 likely to practice handwashing with soap. Four studies found an inverse relationship where  
33 those with higher rates of anxiety were less likely to wash their hands with soap. The review  
34 found mixed results for the association between handwashing and depression, with four of the  
35 seven studies reporting those with higher rates of depression were less likely to wash their  
36 hands, while the remaining studies found that higher depression scores resulted in more  
37 handwashing. Mixed results were also found between post-traumatic stress disorder (PTSD)  
38 and handwashing. Two studies found that lower scores of PTSD were associated with better  
39 hygiene practices, including handwashing with soap.

40 The contradictory patterns suggest that researchers and practitioners need to explore this  
41 association further, in a wider range of crises, and need to standardize tools to do so.

## 42 **Introduction**

43 Humanitarian crises pose a serious threat to the health, safety, security, and wellbeing of  
44 communities, and affect large numbers of people across the world [1]. Crises can lead to forced  
45 displacement and disruptions to physical and social environments. Therefore, for security  
46 reasons, crisis-affected populations often live in densely populated environments with  
47 inadequate sanitation and hygiene leading to an increased risk of outbreak-related diseases, and  
48 diarrhoeal and respiratory illnesses [2-6]. Consequently, a core component of humanitarian  
49 responses to crises often involves water, sanitation, and hygiene (WASH) interventions [3, 7].  
50 In particular, improving hand hygiene behaviour, is known to be highly cost-effective and can  
51 result in diarrhoeal disease reductions of 23% - 48% and reductions in respiratory infections of  
52 21-23% [8-13].

53 However, handwashing behaviour is embedded in daily routines and is an activity that demands  
54 effort, time, and motivation. Like most behaviours, handwashing is known to be influenced by  
55 a range of cognitive determinants and factors in the social and physical environment [14].  
56 Handwashing may therefore be more challenging for crisis-affected populations to practice  
57 given that they are more likely to have been exposed to traumatic situations and face difficult  
58 living conditions, all of which may affect their mental health.

59 Mental health is more than just the absence of a mental disorder [15]. It is a state of well-being,  
60 defined as an individual being able to realise their potential, cope with the everyday stresses of  
61 life, work productively, and contribute to their community. In humanitarian crises, depressive  
62 and anxiety disorders are the most common mental health issues encountered [16, 17].

63 Additionally, studies have shown that traumatic disorders, particularly post-traumatic stress  
64 disorders (PTSD) and obsessive-compulsive disorders (OCD) related to trauma, also occur  
65 more frequently during humanitarian crises [16-19].

66 The link between handwashing practices and mental health has yet to be extensively studied  
67 [20]. However, literature from high-income settings indicates that some personal hygiene  
68 behaviours, including handwashing, may be affected by mental health. For example, poor  
69 personal hygiene is known to be a feature of certain psychiatric conditions such as  
70 schizophrenia and depression [21-23]. The lack of research on this topic in low- or middle-  
71 income countries (LMICs) or humanitarian crises may be partially because, in such settings,  
72 mental health is often under resourced and staffed, and culturally stigmatised, resulting in  
73 mental health issues going undiagnosed and untreated [20]. Similarly, there are often barriers  
74 to understanding handwashing behaviour in these settings. Self-reported handwashing  
75 behaviour is likely to overestimate actual practice because handwashing is a socially desirable  
76 behaviour [24, 25]. Observation, which is considered a more reliable method of measuring  
77 handwashing, is time consuming and resource intensive and is therefore rarely undertaken at  
78 scale [14, 26].

79 This scoping review aims to map out what is known about the association between mental  
80 health and the perceived and actual ability of adults to practice handwashing in humanitarian  
81 crises. It does so with the aim of identifying opportunities for humanitarian practitioners or  
82 researchers to better integrate mental health and hygiene work to improve the wellbeing and  
83 health of crisis-affected populations.

84

## 85 **Methods**

86 A protocol for the scoping review was drafted following the process outlined by Arksey and  
87 O'Malley [27]. This process involves five steps: 1) Identifying relevant studies through a clear  
88 search strategy, 2) a 'Consultation exercise' to seek out grey literature for inclusion, 3) Study  
89 selection based on eligibility criteria, 4) Charting the data, 5) Collating, summarizing, and  
90 reporting the results. These steps are described below. The scoping review protocol is available  
91 on request from the corresponding author.

92

## 93 **Key definitions, search terms and search strategy for published** 94 **literature**

95

96 To undertake the review three main parameters, and associated sub-concepts within these, had  
97 to be defined and search terms identified. These main parameters included humanitarian crises  
98 affecting LMICs, mental health, and handwashing. To arrive at these definitions and terms an  
99 exploratory search of the literature was conducted and then this was refined in discussion with  
100 stakeholders who worked on hygiene or mental health programmes in humanitarian settings.  
101 The parameters, definitions, terms and a rationale for their selection are provided in Table 1  
102 and in detail in S1 Table.

103 LMICs were defined according to the World Bank Classifications and humanitarian crises was  
104 defined as covering disasters, outbreaks, conflicts, and complex crises. Mental health was  
105 defined through consultations with staff working within the Mental Health and Psychosocial  
106 Support (MHPSS) Sub-Cluster who suggested that priority mental health conditions in  
107 humanitarian settings are trauma and stress-related disorders, particularly PTSD; depressive  
108 disorders, and anxiety disorders [16, 18, 19]. Accordingly, these were the primary mental

109 health issues researched with each concept being defined according to Diagnostic and  
110 Statistical Manual of Mental Health Disorders (DSM-5) criteria [28]. Discussions with people  
111 in the MHPSS sector revealed that OCD was rarely assessed in humanitarian contexts, and it  
112 was therefore not included. Hand hygiene included concepts related to ‘hygiene behaviour’.  
113 Most literature focuses on handwashing, specifically. Handwashing with soap, hand rinsing  
114 with water only and hand sanitising is most likely to have a public health impact on  
115 communicable disease transmission in crises and is commonly the focus of hygiene promotion  
116 programs in these settings [10]. For that reason, the review focused narrowly on handwashing  
117 behaviour. Handwashing was defined as handwashing with soap, hand cleaning (with water),  
118 or hand disinfection with sanitiser. Handwashing with ash was excluded given that evidence  
119 of its effectiveness at removing or killing pathogens is limited [29]. For each parameter and  
120 sub-concept Medical Subject Headings (MeSH) terms were used along with other targeted  
121 keywords and search terms.

122 **Table 1: A summary of the main parameters, their definitions and search terms and a**  
123 **rationale for their inclusion**

| <b>Main Parameters</b>                                         | <b>Definitions of key concepts</b>                                                                                                                                                   | <b>Rationale for definition</b>                                                                                         |
|----------------------------------------------------------------|--------------------------------------------------------------------------------------------------------------------------------------------------------------------------------------|-------------------------------------------------------------------------------------------------------------------------|
| Humanitarian crises affecting low- and middle-income countries | Disasters (flood, landslide, typhoon, tsunami, hurricane, drought, famine), outbreaks, conflicts (war, armed conflict), complex crises, humanitarian crisis, displacement (migrants, | The majority of people displaced due to humanitarian crises are hosted in low- and middle-income countries (LMICs) [30] |

|                      |                                                                                            |                                                                                                                                                                                                                                                                                                      |
|----------------------|--------------------------------------------------------------------------------------------|------------------------------------------------------------------------------------------------------------------------------------------------------------------------------------------------------------------------------------------------------------------------------------------------------|
|                      | refugees, internal displacement, guests)                                                   |                                                                                                                                                                                                                                                                                                      |
|                      | Low- and middle-income countries (World Bank Classification)                               | The World Bank classification of countries by income level based on the 2022 fiscal year was used to classify countries as LMICs [31].                                                                                                                                                               |
| Mental Health issues | Mental health (mental health, emotional distress, psychosocial support, personal wellbeing | Not all studies formally measure or categorize mental health. Therefore, broader and more informal terms may appear in the literature.                                                                                                                                                               |
|                      | Anxiety disorders                                                                          | DSM-5 criteria were used to describe symptoms of anxiety. Consultations with staff working in the MHPSS Sub-Cluster suggested that anxiety disorders, depressive disorders, and trauma and stress-related disorders, particularly PTSD, are priority conditions in humanitarian crises [16, 18, 19]. |
|                      | Depressive disorders                                                                       | DSM-5 criteria were used to describe symptoms of depression [28].                                                                                                                                                                                                                                    |

|              |                                                                                                |                                                                                                                                                                                                 |
|--------------|------------------------------------------------------------------------------------------------|-------------------------------------------------------------------------------------------------------------------------------------------------------------------------------------------------|
|              | Trauma and Stress related disorders (post-traumatic stress disorder, trauma, distress, stress) | DSM-5 criteria were used to describe symptoms of trauma and stress related disorders [28].                                                                                                      |
| Hand Hygiene | Handwashing with soap, hand cleaning, handwashing                                              | Handwashing with soap is most likely to have a public health impact on communicable disease transmission [10].                                                                                  |
|              | Hand rinsing (with water only)                                                                 | Despite recommendations to use soap, handwashing with water only remains common in many LMICs and humanitarian settings [3, 14, 26, 32].                                                        |
|              | Hand disinfection with sanitiser                                                               | In certain types of outbreaks, such as that of COVID-19, WHO recommends the use of alcohol-based hand sanitisers, particularly in settings where access to water and soap are limited [33, 34]. |
| Population   | Adults                                                                                         | The main reason for this was that young children require support to practice handwashing [35]. Additionally, there are different                                                                |



|  |  |                                                               |
|--|--|---------------------------------------------------------------|
|  |  | criteria in the DSM-5 to diagnose disorders in children [36]. |
|--|--|---------------------------------------------------------------|

124 \*A complete list of search terms is included in S1 Table.

125 Five electronic databases were initially searched in June and July 2021: PubMed, Medline,  
126 Global Health, Embase, and the online library of the London School of Hygiene and Tropical  
127 Medicine (LSHTM). The search was repeated in January 2023 and covered July 2021 until  
128 January 2023, capturing literature published after the initial search.

### 129 **Identification of grey literature**

130 Grey literature was also identified in June and July 2020 through a two-step process. This  
131 initially involved searching publicly available humanitarian or hygiene-related websites,  
132 including ReliefWeb, and resources on the websites of the Global WASH Cluster, The Global  
133 handwashing Partnership, the MHPSS Sub-Cluster, the United Nations Children’s Fund  
134 (UNICEF), the United Nations High Commissioner for Refugees (UNHCR), the Inter-Agency  
135 Standing Committee (IASC), the International Committee of the Red Cross (ICRC), the  
136 International Federation of the Red Cross (IFRC), the International Rescue Committee (IRC),  
137 Action contre la Faim (ACF), and the Centers for Disease Control and Prevention (CDC). The  
138 WASH and mental health resource pages were scanned in particular. The grey literature  
139 searches used a combination of the terms and MeSH terms mental health, hand hygiene, and  
140 humanitarian crises, to identify resources (Table 1).

141 The second process employed to identify grey literature was a consultation process [27]. This  
142 involved contacting academics who have done research on relevant topics and humanitarian  
143 practitioners and contacting organizations within the Global Handwashing Partnership, the  
144 Hand Hygiene for all Initiative, the Global WASH Cluster, the MHPSS Sub-Cluster, and the

145 IASC Reference Group and asking them to share any relevant grey literature documents that  
146 they were aware of. Requests for literature were also made via several public forums including  
147 the Sustainable Sanitation Alliance (SuSanA) and several humanitarian and WASH oriented  
148 Facebook groups.

## 149 **Inclusion and exclusion criteria**

150 No limit was placed on the publication date of published or grey literature and all study designs  
151 were included. Therefore, any original research studies, policy briefs, theoretical papers, and  
152 qualitative or quantitative data were included. To be eligible, publications had to mention  
153 handwashing and mental health in the results of the manuscript or findings sections of grey  
154 literature documents and publication had to be in English.

## 155 **Data Extraction and Analysis**

156 Publications identified through the search process were imported into EndNote 20 and  
157 duplications were removed. Publications were initially screened based on their titles and  
158 abstracts, and subsequently full texts reads were done to assess whether they met the eligibility  
159 criteria. The charting process for included publications involved summarising the following  
160 information for each document: journal or publishing organization, year of publication, study  
161 location, aims and objectives, description of context, study population, description of methods,  
162 outcome measures (for both the mental health and handwashing), description of association  
163 between mental health and handwashing, and a summary of any identified opportunities for  
164 sector integration or programme strengthening. Patterns across the study parameters were then  
165 identified and descriptively summarised.

## 166 **Ethics statement**

167 This study was approved by the Research Ethics Committee at the London School of Hygiene  
168 and Tropical Medicine (submission ID: 25636). No consent was required given that this study  
169 did not involve human subjects.

## 170 **Results**

171 The search of published literature yielded 3,234 texts. After removing duplicates and  
172 conducting a screening of titles, 784 studies remained. A more detailed screening of abstracts  
173 led to 186 full texts being reviewed. Of these, 21 met the inclusion criteria. The grey literature  
174 search and the consultations with relevant experts led to the identification of 54 documents, of  
175 which four were eligible for inclusion. A PRISMA flow chart summarising the data screening  
176 process is provided in Fig 1.

177 **Fig 1. PRISMA flow diagram. This diagram outlines the screening process.**

## 178 **Characteristics of the included studies:**

179 All the included manuscripts or documents were published after 2013, with one published in  
180 2013, one in 2014, one in 2016, 11 in 2020, eight in 2021, and three in 2022. The majority of  
181 the publications in the last three years were focused on or mentioned the COVID-19 pandemic.

182 Table 4 provides a summary of the study settings and study populations for the included  
183 publications. Most publications (n = 20) reported on disease outbreaks, particularly COVID-  
184 19, Ebola Virus Disease (EVD) (n = 1), and Avian Influenza A (H7N9) (n = 1). COVID-19  
185 studies were mostly conducted in China (n = 12) and Ethiopia (n = 3). Most grey literature  
186 documents (n = 3) provided data on multiple countries. The studies conducted in Malawi, Sierra  
187 Leone, and Iraq were conducted during a complex crisis, EVD outbreak, and conflict,

188 respectively. No included publications were set in a natural disaster setting. Of the country-  
 189 specific studies, most were conducted in urban China (n = 9) and one in an urban region of Iran  
 190 (n = 1). Only three studies were conducted in rural areas. Four studies investigated urban and  
 191 rural settings in China (n = 3) and Sierra Leone (n = 1). Three studies did not specify a setting  
 192 type. Most publications (n = 17) studied adults in general, but some focused more narrowly on  
 193 sub-sections of the population such as factory workers (n = 2), displaced populations (n = 4) or  
 194 pregnant women (n = 1). The grey literature documents (n = 3) did not explicitly describe study  
 195 populations.

196 **Table 2. Type of humanitarian crisis and the study setting.**

| Type of humanitarian crisis and setting | Count (n = 25) |
|-----------------------------------------|----------------|
| Type of crisis                          |                |
| Outbreak                                | 20             |
| Complex Crisis                          | 2              |
| Conflict                                | 1              |
| Humanitarian emergency (general)        | 2              |
| Natural disaster                        | 0              |
| Country                                 |                |
| China                                   | 12             |
| Ethiopia                                | 3              |
| Multiple countries                      | 3              |
| Malawi                                  | 2              |
| Iraq                                    | 2              |
| Iran                                    | 1              |
| Sierra Leone                            | 1              |

|                                          |    |
|------------------------------------------|----|
| Peru                                     | 1  |
| Type of Setting                          |    |
| Urban                                    | 14 |
| Rural                                    | 3  |
| Both                                     | 4  |
| Not specified                            | 4  |
| Studied Population                       |    |
| Adults (general)                         | 17 |
| Displaced populations (refugees or IDPs) | 4  |
| Factory workers                          | 2  |
| University students                      | 1  |
| Pregnant women                           | 1  |

197

198 The majority of included peer-reviewed publications featured a cross-sectional study design (n  
199 = 19). Two papers described a longitudinal design that incorporated data collection from the  
200 same households before and after handwashing intervention. 15 of the studies used  
201 questionnaires as their primary data collection method, one used interviews, four studies  
202 conducted both surveys and interviews, and one study used observations, focus group  
203 discussions, in-depth interviews and handwashing demonstrations. The grey literature were all  
204 guidance documents featuring case studies.

## 205 **Outcome measures:**

206

207 Eight studies focused on a particular mental health condition. Anxiety was the primary outcome  
208 in five publications [37-41]. The Generalized Anxiety Disorder 7-item scale (GAD-7) was used

209 to measure anxiety in two studies [37, 39]. One publication used the Self-rating Anxiety Scale  
210 (SAS) to measure anxiety [40] and another study used the COVID-19 Induced Anxiety Scale  
211 (CIAS) for the same purpose [41]. Other study-specific questions addressing worry, life and  
212 death pondering, difficulty in daily life, and anxiety related to perceived infection probability  
213 were used to measure anxiety in one publication [38].

214 Depression was measured in three studies. The Patient Health Questionnaire-9 (PHQ-9) was  
215 used to assess this in all three studies [42-44].

216 No included publications had PTSD as the sole mental health outcome.

217 13 studies assessed more than one mental health outcome. Anxiety, depression, and PTSD were  
218 the outcomes of seven studies [45-47, 49-52]. Anxiety, depression, and PTSD were jointly  
219 assessed through the Hopkins Symptom Checklist (HSCL-25) in one study [47]. Three other  
220 studies used the Depression, Anxiety, and Stress scale-21 (DASS) to collect data on these  
221 disorders [48-50]. Additionally, one study referred to anxiety, depression, and trauma as  
222 “common mental disorders” [46[p350]] (CMDs) experienced by vulnerable populations in  
223 developing countries exposed to emergencies. CMDs were measured through the WHO’s Self-  
224 Reporting Questionnaire (SRQ-20). Another study also relied on the SRQ-20 but referred to  
225 the mental health conditions of anxiety, depression, and stress. Lastly, in two studies mental  
226 health was described as psychological distress [53] or psychological well-being [51] measured  
227 by the Kessler-10 questionnaire and the General Health Questionnaire (GHQ-12), respectively.  
228 Three grey literature documents focused on a range of mental health issues that commonly  
229 arise in crises or outbreaks and did not describe specific tools for measuring these but suggested  
230 that mental health conditions should be assessed by trained mental health experts [45, 54, 55].  
231 Anxiety and depression were the outcomes of four studies [56-59]. The GAD-7 was used to  
232 measure anxiety in three studies [56, 57, 59], and the State-trait Anxiety Inventory was used in

233 another [58]. To measure depression, two studies used the PHQ-9 [56, 59], one study used the  
234 PHQ-2, and one study used the Self-rating Depression Scale (SDS) [58].

235 Lastly, two studies were included despite not having any mental health parameters as an  
236 outcome. Both studies [60, 61], mental health arose from interviews as a challenge to practicing  
237 handwashing behaviour in displacement camps in Iraq, therefore meeting inclusion criteria.

238 Handwashing with soap was the most common outcome measure ( $n = 11$ ). In seven studies,  
239 handwashing with soap was self-reported through questions developed specifically for that  
240 study [37, 38, 47-49, 56, 57]. One study referred to handwashing at the five key moments [52].  
241 Self-reported questions included the average number of times people washed their hands daily  
242 with soap and running water [57], reported changes in handwashing habits [38], frequency of  
243 immediate handwashing when returning home [37], and average handwashing duration [37],  
244 among others. Three studies used self-reported questions on handwashing used in prior  
245 research, including a standardised Barrier Analysis Survey [60] and standardised surveys or  
246 questions related to hand hygiene during the COVID-19 pandemic [39, 48, 49]. Three  
247 publications used proxy measures to assess handwashing behaviour, such as the standard global  
248 handwashing indicator, which assesses the availability of handwashing facilities with soap and  
249 water present [45, 46, 60].

250 Three studies measured both handwashing with soap and hand sanitising as hygiene outcomes  
251 [42-44]. All three publications measured this behaviour through study-specific self-reported  
252 questionnaires with questions including the frequency at which participants sanitised their  
253 hands with soaps or alcohol-based sanitisers [43, 44] and perception of cleanliness after  
254 disinfecting and handwashing [42]. One study referred to ‘hand hygiene’ as the primary  
255 outcome [58]. While this was not clearly defined it was assumed that this may also include  
256 both handwashing with soap and hand sanitising behaviours. This behaviour was measured

257 through a study-specific questionnaire with questions including preventive measures followed  
258 against COVID-19 infection [58]. Lastly, two grey literature publications did not specify how  
259 hygiene behaviour was defined, nor did they mention how this behaviour was measured [54,  
260 55].

## 261 **Anxiety and handwashing**

262  
263 Of the 11 studies that provided data on anxiety and handwashing with soap, six found a positive  
264 correlation between handwashing with soap and anxiety, where participants with higher rates  
265 of anxiety were more likely to practice handwashing with soap [37- 39, 41 56, 57]. Four studies  
266 found an inverse relationship in which those with higher rates of anxiety were less likely to  
267 wash their hands with soap [48-50, 59]. One study found no direct relationship between anxiety  
268 and handwashing [40]. No included publications reported on anxiety and hand sanitising.  
269 However, one publication reported on anxiety and hand hygiene in general [58]. This study  
270 found that respondents' anxiety did not relate to public behaviour change and preventive  
271 measures.

272 During the COVID-19 pandemic, Birhanu et al. [41] found a strong positive correlation  
273 between anxiety and protective behaviours, of which frequent handwashing was one. During  
274 the outbreak in a urban setting in Ethiopia, participants who displayed high protective  
275 behaviour had twice the odds of COVID-19 induced anxiety compared to participants with a  
276 moderate level of preventive behaviour (AOR = 2.2, 95% CI: 1.5 – 3.3) [41]. Qian et al. [37]  
277 also found a positive correlation between anxiety and handwashing among adults. A  
278 significantly higher proportion of residents near the outbreak's epicentre in Wuhan, China  
279 reported moderate or severe anxiety than participants further away from the outbreak in  
280 Shanghai, 32.8% and 20.5%, respectively. Wuhan residents were also more likely to follow the



281 recommendations than the Shanghai residents. However, both groups reported always washing  
282 hands immediately when returning home, a new recommended critical moment for  
283 handwashing during the pandemic [37]. Similarly, in Iran, Mohammadpour et al. [39] found a  
284 borderline significant relationship ( $P$ -value = 0.06) where among participants with anxiety, for  
285 those who believed that one must practice handwashing with soap as much as possible during  
286 the COVID-19 epidemic, the mean score for anxiety was lower than the mean score for those  
287 who did not feel frequent handwashing was important. Ni and colleagues [57] also found a  
288 positive correlation between anxiety and handwashing. Here, however, a higher frequency of  
289 handwashing (Adjusted OR (aOR)=1.02,  $p$ =0.03), living near the epicenter (aOR=2.85,  $P$ -  
290 value < 0.01), and meeting the screening criteria for depression (aOR=24.20,  $P$ -value < 0.01)  
291 were independently associated with moderate and severe anxiety symptoms. Among pregnant  
292 women in China also during the COVID-19 pandemic, decreased rates of anxiety led to  
293 decreased handwashing rates ( $r = -0.08$ ,  $P$ -value < 0.001) [56]. After adjusting for socio-  
294 demographic and pregnancy-related factors, only social support was associated with lower  
295 anxiety levels (aOR = 0.86-0.87) and a higher frequency of handwashing (aOR = 1.06) [56].  
296 Similar findings were also reported in other outbreaks. In the EVD outbreak in Sierra Leone,  
297 individuals with higher reported anxiety levels reported increased EVD prevention behaviours  
298 [47]. In response to the H7N9 outbreak in China, 42.80% of respondents increased  
299 handwashing habits [38].

300 Among a similar study population of urban residents in China during the COVID-19 pandemic,  
301 handwashing with soap was significantly associated with lower anxiety scores [48]. During the  
302 epidemic's peak, particularly handwashing with soap was significantly associated with lower  
303 anxiety scores among survey participants [49]. Access to adequate availability of handwashing  
304 materials in cafeterias, libraries, and classes was also linked to university students in Ethiopia  
305 being 42% less likely to develop anxiety compared to students with inadequate access to these

306 materials (AOR = 0.58, CI: 0.43 – 0.81) [51]. Similar results were also found among study  
307 populations in rural residents in China, where high levels of anxiety predicted lower  
308 compliance levels with preventive behaviours (OR = 1.55, 95% CI: 1.10–2.18, P- value < 0.05),  
309 including frequent handwashing [59].

310 In a sample of 28 provinces and cities in China, hand hygiene was one of the most common  
311 preventive measures to be adhered to, with 82.4% of respondents demonstrating this. However,  
312 respondents' anxiety did not relate to public behaviour change and preventive measures [59].

313 In a similar study population in China, it was found that there was no significant direct  
314 relationship between anxiety and compliance with preventive behaviours, including  
315 handwashing [40].

## 316 Depression and handwashing

317 Eight studies provided data on depression and handwashing outcomes. Two studies found  
318 positive relationships where the variables of handwashing and depression increased and  
319 decreased together [56, 60]. Four studies found inverse relationships where those with higher  
320 rates of depression were more likely to wash their hands or vice versa [38, 43, 44, 60].  
321 Following the EVD outbreak in Sierra Leone, one study found no significant association  
322 between depression and handwashing [47]. Similar results were found during the COVID-19  
323 outbreak in China, where no statistically significant relationship was found between depression  
324 and compliance to preventive behaviours, including handwashing [59].

325 One publication reported on depression and hand hygiene across 28 provinces and cities in  
326 China, 82.4% of participants adhered to frequent hand hygiene practices during the COVID-  
327 19 outbreak. However, fewer respondents with depression practiced handwashing with soap  
328 than those without depression [58].

329 During the COVID-19 outbreak, amongst pregnant women in China, those with lower rates of  
330 depression were less likely to wash their hands with soap daily [38]. Similar results were found  
331 where participants who never felt clean after repeatedly disinfecting and scrubbing their hands  
332 and items had significantly higher depression scores (P-value < 0.001) [42]. Being calm (OR  
333 0.344, 95% CI 0.186-0.635) and having social support (OR 0.529, 95% CI 0.308-0.908) was  
334 negatively associated with depression.

335 Contrastingly, among factory workers in Shenzhen, China, more exposure to unofficial web-  
336 based media was associated with higher compliance with hand sanitising and higher depressive  
337 symptoms after adjusting for demographic variables. However, exposure to information about  
338 positive outcomes for COVID-19 patients, prevention and treatment developments, and heroic  
339 stories about frontline healthcare workers were associated with better mental health and higher  
340 compliance to preventive measures, including hand sanitising (adjusted B= -0.16, P-value =  
341 0.045) [43]. In another study in the sample population, depressive symptoms were associated  
342 with less self-reported sanitising of hands (AORs of 0.93, CI 0.91-0.94) [44]. During the  
343 epidemic's peak, observing better hygiene practices, particularly washing hands with soap and  
344 water, and doing so after coughing, rubbing the nose, and sneezing, were significantly  
345 associated with lower depression scores [48, 49].

## 346 **PTSD and handwashing**

347 Different relationships were found among the included publications with PTSD and  
348 handwashing outcomes. Two studies conducted during the COVID-19 pandemic found an  
349 inverse relationship. Observing better hygiene practices was significantly associated with  
350 lower scores in PTSD symptoms [48, 49]. Washing hands immediately after coughing,  
351 sneezing, or rubbing the nose was significantly associated with lower PTSD symptoms (B = -  
352 0.47) [48]. Similarly, after the initial peak of COVID-19 cases in China, significant positive

353 associations were found between washing hands with soap and water most of the time and  
354 occasionally and PTSD symptoms [49]. When participants washed their hands immediately  
355 after coughing, rubbing the nose, or sneezing, this was associated with lower scores of PTSD  
356 [49].

357 PTSD and handwashing during the COVID-19 pandemic yielded similar results to PTSD and  
358 handwashing during the EVD outbreak. A positive relationship was found in the latter, where  
359 higher war exposure levels ( $B = 0.45$ ;  $P\text{-value} = 0.003$ ) were associated with greater EVD  
360 prevention behaviours such as frequent handwashing. PTSD symptoms, however, were  
361 associated with fewer EVD prevention behaviours ( $B = -0.24$ ;  $95\% \text{ CI } -0.43, -0.06$ ;  $P\text{-value}$   
362  $= 0.009$ ) [47].

363 No included publications reported on PTSD and hand hygiene only.

## 364 **Combination of disorders and handwashing**

365 Variety existed in the combinations of mental disorders and their associations with  
366 handwashing with soap and hand sanitising. When combining anxiety, depression, and PTSD  
367 into the single measurement of CMDs, the results showed that while handwashing with soap  
368 increased among all participants, the increase level was significantly lower among people with  
369 poor mental health than those with good mental health. The influence of mental health on  
370 handwashing behaviour was significantly mediated by feelings and difficulty in getting enough  
371 soap for handwashing [46].

372 Four studies combined mental health disorders into a single mental health measure [51-53, 61].  
373 All four studies reported inverse relationships between mental health and handwashing  
374 behaviour. During the COVID-19 outbreak in Ethiopia, the odds of having psychological  
375 distress was highest among adults who disagree with washing their hands frequently with water

376 and soap to prevent COVID-19 and having the resources to practice such behaviour, (AOR  
377 4.17, 95% CI 1.43-12.15) and (AOR: 2.62; 95% CI 1.20–5.70), respectively [53]. Similar  
378 findings were found in Peru, where a statistically significant negative association was found  
379 between psychological distress and washing hands after coughing, touching the nose, or  
380 sneezing (P-value < 0.001) and washing hands with soap and water (P-value = 0.035) [51].  
381 Similar results were also found in a complex crisis and displacement camp setting.

382 In rural Malawi, a study found a significant negative association between mental health and  
383 handwashing with soap at key times ( $r = -0.135$ , P-value  $\leq 0.01$ ) after a group of participants  
384 received an intervention on the importance of food hygiene techniques. The levels of  
385 handwashing with soap at key times in this group was lower among people with poor mental  
386 health compared to people with good mental health but the influence of the intervention on  
387 handwashing with soap at key times was mediated by mental health ( $b = 0.0205$ , CI 0.0035 to  
388 0.0439) [52]. In another non-outbreak setting, participants residing in displacements camp in  
389 Northern-Iraq explained that they had been experiencing mental health challenges because of  
390 conflict. Some explained that they relied on handwashing as a coping mechanism that helped  
391 them manage their trauma and worries, but the associational relationship between mental health  
392 challenges and handwashing with soap at critical times varied at an individual level across the  
393 different types of camp settings [6 1].

## 394 **Examples of Mental Health and Handwashing Programming**

395 Grey literature reports provided case studies from different settings, including anecdotal reports  
396 of high distress levels among crisis-affected populations. In a case study of Cox's Bazar in  
397 Bangladesh, psychosocial volunteer investigated available MHPSS for displaced populations.  
398 Though many individuals in the camps showed high distress levels, many did not initially  
399 prioritize seeking such services because of physical and material needs [55]. Furthermore, the

400 standard of hygiene in such settlements influence people’s health and their psychosocial well-  
401 being [45]. Simultaneously, it is often difficult for people suffering from the effects of trauma  
402 to devote sufficient attention to personal hygiene. In the case study of Syrian refugees in Jordan,  
403 ACF’s mental health and care practices staff identified inadequate hygiene as a contributing  
404 factor to psychological distress in refugee populations [45]. These findings were mirrored in a  
405 study in IDP camps in Iraqi Kurdistan, where mental health challenges arose as barriers to  
406 practicing hand washing [60].

## 407 Discussion

### 408 **Summary of findings: analysing the literature**

409 This review aimed to map out what is known about the association between mental health and  
410 people’s perceived and actual ability to practice handwashing behaviours in humanitarian  
411 crises. The review filled a gap in existing literature as the link between hygiene and  
412 psychological health had yet to be extensively studied [20]. Ultimately, 25 publications were  
413 included, 21 peer-reviewed articles, and four grey literature publications. Despite the overall  
414 lack of a consensus among the findings, some patterns emerged. The most common patterns  
415 form the basis for the recommendations for practitioners.

416 The most common finding for anxiety was that participants with higher rates of anxiety were  
417 more likely to practice handwashing with soap. Existing literature reviews and studies of  
418 pandemic-related behaviours and psychological outcomes also demonstrated this relationship  
419 [50]. Anxious individuals may have higher vigilance levels or concerns about the disease  
420 epidemic. It may also be that increased vigilance leads to the development of anxiety in  
421 individuals who are more engaged in precautionary measures [47]. This may be because  
422 anxiety is elicited primarily by a threat and negative emotions. In general, anxiety may have

423 evolved to serve adaptive and protective functions to help keep individuals safe [63, 64]. In the  
424 COVID-19 pandemic, this may be the case where negative emotions and worry encourage  
425 adherence to public health-compliant behaviour change [64, 62]. This also supports the  
426 findings that decreased anxiety rates led to decreased handwashing rates [56].

427 Another emerging pattern was contradictory, namely that those with higher rates of anxiety  
428 were less likely to wash their hands with soap [48, 49]. This finding was also reported in the  
429 existing literature [65, 66]. In Malawi, a complex crisis setting, researchers also found  
430 differences between people with higher and lower levels of depression, anxiety, and PTSD in  
431 changes to psychosocial factors. These factors included experiencing positive feelings while  
432 washing hands with soap [46]. People with poor mental health perceive themselves to be more  
433 vulnerable, are less confident about performing preventive behaviours, forget to wash their  
434 hands with soap more often, and are less committed to washing their hands with soap [66, 67].

435 The review found mixed results for the association between handwashing and depression. Four  
436 of the seven studies reported that those with higher rates of depression were less likely to wash  
437 their hands. In contrast, the remaining studies found that higher depression scores resulted in  
438 more handwashing. Previous research done among children in Zimbabwe supported this  
439 inverse relationship between the two factors [18]. Depressed individuals more frequently forgot  
440 to wash their hands and experienced less pleasure. They also felt less guilty when not washing  
441 their hands and had less intention to wash their hands with soap. Such individuals considered  
442 themselves less vulnerable to contracting diseases and were less aware of disease severity.  
443 Overall, depression moderates the relationship between behavioural determinants and  
444 handwashing through negative patterns of thought, evaluations of the self, the environment,  
445 the future, thoughts of worthlessness, and thoughts of death or suicide [18].

446 PTSD and handwashing also found mixed results. Of the three studies on PTSD, two found  
447 that lower scores of PTSD were associated with better hygiene practices, including  
448 handwashing with soap. In an outbreak in a post-war setting, higher war exposure was  
449 associated with more frequent handwashing. However, PTSD symptoms specifically were  
450 associated with less handwashing [47]. Among those having experienced war, individuals with  
451 higher exposure to traumatic experiences may have more resilient survival skills or have  
452 become more risk averse. Individuals experiencing PTSD may deal with this in the same way,  
453 potentially because the salience of the threat of a disease like EVD may not be as great as that  
454 of violence and war [47, 68]. Similarly, studies have found that among resettled refugees in  
455 high-income countries, the threat of disease may bring up memories of lower standards of  
456 hygiene, lack of health infrastructure, and inadequate supplies, which may exacerbate existing  
457 mental health conditions [69].

458 The contradictory patterns suggest that researchers and practitioners need to explore this  
459 association further. Improving outcome measurement through standardized and non-self-  
460 reported tools and utilizing different study designs utilising qualitative methods could help  
461 increase the evidence base. The lack of practical recommendations is also worth exploring and  
462 should be the subject of further research and programming. There are opportunities for hygiene  
463 programs to strengthen social support mechanisms, for example, by looking to care groups as  
464 a potential model. Similarly, hygiene practitioners could be trained in mental health first aid as  
465 part of their programming to identify the needs of their target population. Providing simple  
466 mental health tips could help individuals deal with their conditions.

## 467 **Summary of findings: characteristics of the studies**

468 Most of the research was conducted during the COVID-19 pandemic, likely stemming from  
469 the worldwide promotion of handwashing and self-isolation as key preventive measures against



470 infection. Promoting handwashing is typically done in epidemics in the initial absence of  
471 vaccines and treatments [57]. The COVID-19 pandemic was unprecedented. A novel  
472 coronavirus discovered in Wuhan, China, spread rapidly worldwide, causing widescale  
473 mortality, economic devastation, and unprecedented measures, including border closures and  
474 restrictions in day-to-day life [62]. The high number of publications from China may be  
475 because the virus was first detected in this region. The pandemic has impacted the mental health  
476 of the public through the promotion of self-isolation measures which has led to psychological  
477 crises in some cases because of rapidly changing rules, fear, and insecurity [70].

478 Included publications were skewed towards outbreaks, and no included publications reported  
479 on natural disasters. Similarly, only a few publications reported on displaced populations as  
480 the study population ( $n = 4$ ). Therefore, it may be difficult to generalize these findings to  
481 displaced populations. Despite this, in the publications studying displaced populations, it was  
482 clear that dealing with mental health is not always at the forefront of people's minds [55, 71].  
483 Despite these innovative approaches, a lack of handwashing hardware and challenges accessing  
484 the hardware and mental health services still impede handwashing practices in camps [45, 60,  
485 71].

## 486 **Methodological limitations of included studies**

487 A series of methodological limitations of included studies exist. The limitations included a lack  
488 of qualitative literature in the sample, longitudinal studies and standardized outcome measures  
489 for handwashing.

490 There is a gap in how far an association can be established. Grey literature, as well as some  
491 peer-reviewed articles, provided a source of qualitative literature. Here, case studies and  
492 interviews provided an insight into the relationship between handwashing and mental health at  
493 the individual level.

494 Similarly, there was a lack of longitudinal studies. Most studies in the analysis were cross-  
495 sectional and therefore reflected the psychological state of the study participants at a single  
496 period. Psychological states change with time and according to one's environment [70]. Given  
497 the possibility of humanitarian crises to shift into protracted crises, there is a need to investigate  
498 the long-term impact of a humanitarian crisis on mental health and handwashing behaviour  
499 separately and together.

500 Lastly, the tools to measure mental health outcome measures and handwashing behaviours  
501 were inconsistent across the studies and grey literature publications. This inconsistency creates  
502 a limitation in how far an association can be extracted from this data.

## 503 **Mediating factors affecting hygiene and handwashing**

504 Upon analysis of the findings, three major themes arose, impacting the links between  
505 handwashing and mental health conditions. These include the risk of infection, information  
506 exposure, and social support.

### 507 **Risk of infection**

508 The review found that risk of infection was a mediating factor between the association of  
509 handwashing and mental health. Many included publications were done in or near the  
510 geographical epicentre of the COVID-19 outbreak (n = 12). Residing in the geographical  
511 epicentre of an outbreak may have contributed to anxiety mediating the relationship with the  
512 practicing of handwashing behaviour due to the increased likelihood of infection. Previous  
513 literature [66] supports this finding where living in the geographical epicentre of an outbreak  
514 was likely related to an increased perceived risk of infection through family, friends, or  
515 community members [70]. The idea is that an increased risk of infection may lead to increased  
516 compliance with protective measures, including handwashing, affecting mental health [70]. A

517 similar study found that the top five motivators for handwashing among internally displaced  
518 persons were protecting children from illness, ridding the body of germs, avoiding illness,  
519 cleanliness, and fear of illness [71]. It is anxiety above normal levels that may make this a self-  
520 fulfilling prophecy that weakens the body's immune system and consequently increases the  
521 risk of contracting the virus [70]. Similarly, some participants never felt clean after disinfecting  
522 and scrubbing their hands and items repeatedly [42]. These individuals had significantly higher  
523 depression scores. Additionally, those who were more concerned about COVID-19 were more  
524 engaged in public health-compliance behaviours such as regular handwashing [64].

## 525 **Information exposure**

526 Three publications outlined that COVID-19-related information exposure mediated the  
527 association between mental health and handwashing [37, 43, 44]. In one study based in Malawi,  
528 mental health mediated the relationship between information exposure and handwashing with  
529 soap at key times [52]. Mixed messages from official sources may lead to confusion and fear,  
530 allowing anxiety to spread rapidly within families and communities [62, 65, 72]. Emotional  
531 contagion is a concept where people transfer negative and positive emotions to others where  
532 people who feel threatened, particularly when in crowds, may panic and act to ensure self-  
533 preservation [73]. This may explain why people participated more in handwashing behaviour  
534 as they are adopting and copying the behaviour of others, acting following public health  
535 messaging and social norms [62]. At the same time, however, research has found that following  
536 more COVID-19 news leads to more anxiety as such news is distressing, and misinformation  
537 can exacerbate depressive symptoms [70]. Media should address low (health) literacy where  
538 information should be simple, understandable, and easy to implement in households [68].  
539 Communities, particularly those affected by humanitarian crises or in low-resource settings,  
540 should be involved in designing such messaging to adapt such messaging as appropriate [54].

## 541 **Social support**

542 Many publications described social support as a critical protective factor for mental health and  
543 associated with a higher frequency of handwashing, mirrored in the existing literature [75].  
544 Social support was conceptualized as providing individuals with stress management training,  
545 strengthening coping skills, recommending strategies for maintaining support relationships,  
546 and perceived help or care from others [42, 56]. A higher level of social support provided  
547 individuals with more cognitive, emotional, and tangible resources to handle the adversities  
548 brought on by the epidemic [56]. Existing literature has shown that social support is effective  
549 at preventing the development of mental health problems, particularly during a public health  
550 crisis [74, 75]. This is because social support and adequate sources of support can help release  
551 stress, maintain a person's emotional responses, and provide positive models for health  
552 behaviours by encouraging engagement in personal preventive behaviours [56, 75].

553 Noncompliance with preventive measures could be a harmful coping response to depressive  
554 symptoms, so providing psychological support may be helpful to enhance compliance [77].  
555 Positive emotions and psychological responses such as calmness and optimism are the reasons  
556 behind the success of social support as a protective factor. They can reduce such symptoms  
557 and, in turn, increase handwashing behaviour [42]. Guidelines for handwashing promotion in  
558 the field also mirror this increasing move to positive emotion-based nudging [78].

## 559 **Emerging insights for researchers and practitioners**

560 A few critical areas for integration between the WASH and MHPSS sectors are clear. Firstly,  
561 humanitarian response should increasingly incorporate mental health [45, 55]. This may be  
562 done by incorporating mental health assessments in WASH surveys. The SRQ-20 is an easy  
563 screening tool to measure this in the field without requiring psychological training for data

564 collection [46]. Additionally, people with poor mental health should receive treatment before  
565 or in parallel with handwashing-promoting interventions to increase positive emotions [46].  
566 Acknowledging that this is extremely difficult to do in a crisis, care may be delivered through  
567 adapted technology-based interventions. One publication reported that during the COVID-19  
568 pandemic, WASH and MHPSS teams went door-to-door to distribute hygiene information,  
569 soap, and other materials. Addressing mental health during WASH training meant more  
570 attention was given to the hygiene session because recipients were less stressed [55]. UNHCR  
571 reported similar findings in the field where an elderly displaced Syrian woman experienced  
572 traumatic events but with the distribution of a hygiene kit, the stress she experienced  
573 compounded the pandemic had subsided [54]. Another intervention could be online or  
574 telephone-based Cognitive Behavioural Therapy, which may be used during outbreaks and  
575 other humanitarian crises [42, 47, 55, 57] or through the use of digital applications following  
576 some specific recommendations [83]. Finally, long-term investments in public, local, and  
577 community-based MHPSS should be made as preparedness and resilience help societies better  
578 respond to MHPSS needs [55]. Particularly, integration in response plans and MHPSS across  
579 sectors should increase access to treatment, ensuring better outcomes across the board [55].

580 The majority of included studies relied on survey-based quantitative measures to assess mental  
581 health and handwashing outcomes. Other, more qualitative methods, such as case studies,  
582 ethnographies, focus group discussions, and key informant interviews, may provide a better  
583 insight into the perceived barriers to handwashing among those experiencing mental health  
584 disorders. Similarly, utilizing more longitudinal approaches could aid in understanding  
585 causality in the association and help distinguish chronic mental health disorders from acute  
586 disorders.

587 There were also limitations with the outcomes measures themselves. Studies primarily used  
588 self-reported measures of behaviours and used various questions to gauge them. The MHPSS  
589 sector should promote a standardized tool to measure each mental health disorder to improve  
590 the quality of outcomes measures and standardize this in future research. The most common  
591 tools were the GAD-7 for anxiety, the PHQ-9 for Depression, and IES-R for PTSD based on  
592 this review. Other literature has also found these tools most common in humanitarian settings  
593 [79]. PHQ-9, GAD-7, and IES-R are brief, easy to carry out, and validated in a wide range of  
594 settings and populations [79-81]. However, limitations exist, such as overestimating  
595 prevalence, lack of cultural sensitivity, and reliance on DSM-IV criteria [79]. Still, these could  
596 be promoted as standard tools to measure these disorders in humanitarian settings. This review  
597 demonstrates that self-reported questionnaires are most common for handwashing because they  
598 are easy to use in low-resource settings. However, to limit social desirability, verification of  
599 soap and water availability at dedicated handwashing stations can be used to add a level of  
600 validity.

601 Current approaches to research in humanitarian crises are siloed with mental health and hygiene  
602 researchers operating in different spaces. Working groups and communities of practices on  
603 WASH and MHPSS can be established to share key learning, best practices from the field, and  
604 challenges experienced to bring the two sectors together. Similarly, guiding documents such as  
605 ACF's manual [45] on integrating WASH and Mental Health and Care Practices for  
606 humanitarian projects provide concrete ways to integrate the sectors. Sector integration can be  
607 carried out joint assessments for WASH and MHPSS interventions, mainstreaming activities  
608 by including an additional element in sector-specific programs and integrating with other  
609 actors.

610 Two main gaps were found based on this review. Firstly, the link between mental health and  
611 hygiene behaviour in other types of humanitarian crises; other populations, particularly  
612 displaced populations; and other countries beyond China should be researched. Handwashing  
613 promotion during crises is considered a secondary priority, except in WASH-related disease  
614 outbreaks [4]. There is evidence, that when handwashing messages are disseminated, behaviour  
615 change initiatives are less effective in acute emergency contexts than relatively stabilized  
616 situations or development contexts [78]. This was not explored in the literature and is,  
617 therefore, an area of future work. Secondly, there is a need to research specific emotional  
618 drivers for practicing handwashing through qualitative approaches, particularly among  
619 displaced populations. This is necessary because it will provide an insight into challenges  
620 perceived at the individual level.

621 The dearth of literature overall suggests a greater need for investigation on the link between  
622 mental health and people's perceived and actual ability to practice handwashing. Therefore, a  
623 systematic review should not be done. Instead, more field studies are recommended during  
624 other types of humanitarian crises and on different populations.

## 625 **Limitations of the scoping review**

626 As with all reviews, a few limitations exist. Firstly, the sample size was small and not  
627 representative of other humanitarian crises beyond outbreaks, particularly outbreak in China.  
628 One reason for this was that only English texts were included. However, the goal of a scoping  
629 review is not generalizability but to provide clarity on what is known in a subject area.  
630 Furthermore, scoping reviews do not assess the quality of evidence. So, there is a danger that  
631 the existence of studies rather than their quality is used as the basis for conclusions. Therefore,  
632 these findings cannot be used to recommend policy [82]. The impact of this limitation was  
633 reduced through the consultation process with relevant stakeholders and the target of informing

634 relevant WASH and mental health stakeholders on whether a systematic review is needed.  
635 Through these processes, relevant experts were able to contribute to this review and determine  
636 for themselves the quality of evidence. Moreover, most included studies were cross-sectional,  
637 and thus causality was impossible to determine. Other types of literature, such as grey literature,  
638 were also consulted to minimize the impact of this, which provided examples of pre-existing  
639 and developing mental health disorders and their links to handwashing.

## 640 **Conclusion**

641 In conclusion, this review found a lack of a consensus among findings to determine the  
642 association between mental health and handwashing. In spite of this, some patterns were more  
643 common than others. Particularly among people with anxiety, the likelihood handwashing  
644 increased as anxiety levels increased. Among those with depressive- and PTSD symptoms as  
645 well as studies measuring a combination of disorders, inverse relationships between mental  
646 health disorders and the likelihood of handwashing were more common. Still, there are some  
647 emerging insights for practitioners, particularly in integrating mental health assessments in  
648 WASH surveys, ensuring that mental health treatment is done in parallel if not before  
649 handwashing-promoting interventions, and long-term investments in public, local, and  
650 community-based MHPSS to support community resilience. Similarly, research should be  
651 continued in this area, notably to explore the link between mental health and people's perceived  
652 and actual ability to practice handwashing, particularly in other types of humanitarian crises;  
653 other populations, particularly displaced populations; other countries, beyond China; and at the  
654 individual level. The future lies in moving past the siloed nature of humanitarian service  
655 provision and only through integrating sectors, can people's health during humanitarian crises  
656 be safeguarded.

657



658 **Acknowledgements:**

659 We would like to thank Stephanie Stern, and Alan Ricardo Patlán Hernández for providing  
660 useful comments on the literature review protocol. We'd like to thank Jennifer Lamb for  
661 reviewing the manuscript.

662

663 The research was made possible by the generous support of the American people through the  
664 United States Agency for international development's Bureau of Humanitarian Assistance. The  
665 contents are the responsibility of the authors of the paper and do not necessarily reflect the  
666 views of USAID or the United States Government.

667

## 668 **References**

- 669 1. Humanitarian Coalition. What Is a Humanitarian Emergency? [Internet]. 2015 [cited  
670 2021 Apr 9]. Available from: [https://www.humanitariancoalition.ca/what-is-a-](https://www.humanitariancoalition.ca/what-is-a-humanitarian-emergency)  
671 [humanitarian-emergency](https://www.humanitariancoalition.ca/what-is-a-humanitarian-emergency)
- 672 2. Shackelford BB, Cronk R, Behnke N, Cooper B, Tu R, D'Souza M, et al.  
673 Environmental health in forced displacement: A systematic scoping review of the  
674 emergency phase. *Sci Total Environ*. 2020 Apr 20;714:136553.
- 675 3. Phillips RM, Vujcic J, Boscoe A, Handzel T, Aninyasi M, Cookson ST, et al. Soap is  
676 not enough: handwashing practices and knowledge in refugee camps, Maban County,  
677 South Sudan. *Conflict and Health*. 2015 Dec 20;9(1):39.
- 678 4. Vujcic J, Ram PK, Blum LS. Handwashing promotion in humanitarian emergencies:  
679 strategies and challenges according to experts. *Journal of Water, Sanitation and*  
680 *Hygiene for Development*. 2015 Sep 23;5(4):574–85.
- 681 5. Checchi F, Warsame A, Treacy-Wong V, Polonsky J, Ommeren M van, Prudhon C.  
682 Public health information in crisis-affected populations: a review of methods and their  
683 use for advocacy and action. *The Lancet*. 2017 Nov 18;390(10109):2297–313.
- 684 6. Connolly MA, Gayer M, Ryan MJ, Salama P, Spiegel P, Heymann DL. Communicable  
685 diseases in complex emergencies: impact and challenges. *Lancet*. 2004 Dec  
686 27;364(9449):1974–83.
- 687 7. Médecins Sans Frontières. Treating diarrhoea in emergency settings | MSF [Internet].  
688 Médecins Sans Frontières (MSF) International. 2003 [cited 2021 Aug 28]. Available  
689 from: <https://www.msf.org/treating-diarrhoea-emergency-settings>
- 690 8. Aiello AE, Larson EL. What is the evidence for a causal link between hygiene and  
691 infections? *Lancet Infect Dis*. 2002 Feb;2(2):103–10.

- 692 9. Rabie T, Curtis V. Handwashing and risk of respiratory infections: a quantitative  
693 systematic review. *Trop Med Int Health*. 2006 Mar;11(3):258–67.
- 694 10. Wolf J, Hunter PR, Freeman MC, Cumming O, Clasen T, Bartram J, et al. Impact of  
695 drinking water, sanitation and handwashing with soap on childhood diarrhoeal disease:  
696 updated meta-analysis and meta-regression. *Tropical Medicine & International Health*.  
697 2018;23(5):508–25.
- 698 11. Freeman MC, Stocks ME, Cumming O, Jeandron A, Higgins JPT, Wolf J, et al.  
699 Hygiene and health: systematic review of handwashing practices worldwide and update  
700 of health effects. *Trop Med Int Health*. 2014 Aug;19(8):906–16.
- 701 12. Ejemot-Nwadiaro RI, Ehiri JE, Arikpo D, Meremikwu MM, Critchley JA. Hand  
702 washing promotion for preventing diarrhoea. *Cochrane Database Syst Rev*. 2015 Sep  
703 3;(9):CD004265.
- 704 13. Curtis V, Cairncross S. Effect of washing hands with soap on diarrhoea risk in the  
705 community: a systematic review. *Lancet Infect Dis*. 2003 May;3(5):275–81.
- 706 14. White S, Thorseth AH, Dreibelbis R, Curtis V. The determinants of handwashing  
707 behaviour in domestic settings: An integrative systematic review. *International Journal*  
708 *of Hygiene and Environmental Health*. 2020 Jun 1;227:113512.
- 709 15. World Health Organization. Mental health: strengthening our response [Internet].  
710 World Health Organization. 2018 [cited 2021 Mar 15]. Available from:  
711 [https://www.who.int/news-room/fact-sheets/detail/mental-health-strengthening-our-](https://www.who.int/news-room/fact-sheets/detail/mental-health-strengthening-our-response)  
712 [response](https://www.who.int/news-room/fact-sheets/detail/mental-health-strengthening-our-response)
- 713 16. Silove D, Ventevogel P, Rees S. The contemporary refugee crisis: an overview of  
714 mental health challenges. *World Psychiatry*. 2017 Jun;16(2):130–9.

- 715 17. Charlson F, Ommeren M van, Flaxman A, Cornett J, Whiteford H, Saxena S. New  
716 WHO prevalence estimates of mental disorders in conflict settings: a systematic review  
717 and meta-analysis. *The Lancet*. 2019 Jul 20;394(10194):240–8.
- 718 18. Slekiene J, Mosler HJ. Does depression moderate handwashing in children? *BMC*  
719 *Public Health*. 2018;18(1):82.
- 720 19. Fontenelle LF, Cocchi L, Harrison BJ, Shavitt RG, do Rosário MC, Ferrão YA, et al.  
721 Towards a post-traumatic subtype of obsessive–compulsive disorder. *Journal of*  
722 *Anxiety Disorders*. 2012 Mar 1;26(2):377–83.
- 723 20. Ranasinghe S, Ramesh S, Jacobsen KH. Hygiene and mental health among middle  
724 school students in India and 11 other countries. *Journal of Infection and Public Health*.  
725 2016 Jul 1;9(4):429–35.
- 726 21. Stewart V, Judd C, Wheeler AJ. Practitioners’ experiences of deteriorating personal  
727 hygiene standards in people living with depression in Australia: A qualitative study.  
728 *Health Soc Care Community*. 2021 Jul 8;
- 729 22. Stevenson RJ, Case TI, Hodgson D, Porzig-Drummond R, Barouei J, Oaten MJ. A scale  
730 for measuring hygiene behavior: development, reliability and validity. *Am J Infect*  
731 *Control*. 2009 Sep;37(7):557–64.
- 732 23. Leibold ML, Holm MB, Raina KD, Reynolds CF, Rogers JC. Activities and adaptation  
733 in late-life depression: a qualitative study. *Am J Occup Ther*. 2014 Oct;68(5):570–7.
- 734 24. Contzen N, De Pasquale S, Mosler HJ. Over-Reporting in Handwashing Self-Reports:  
735 Potential Explanatory Factors and Alternative Measurements. *PLoS One*. 2015 Aug  
736 24;10(8):e0136445.
- 737 25. Ram P. Practical Guidance for Measuring Handwashing Behavior. *Water and*  
738 *Sanitation Program* : working paper [Internet]. Washington DC: World Bank; 2010 p.  
739 16. Available from: <http://hdl.handle.net/10986/19005>

- 740 26. Halder AK, Molyneaux JW, Luby SP, Ram PK. Impact of duration of structured  
741 observations on measurement of handwashing behavior at critical times. *BMC Public*  
742 *Health*. 2013 Aug 2;13(1):705.
- 743 27. Arksey H, O'Malley L. Scoping studies: towards a methodological framework.  
744 *International Journal of Social Research Methodology*. 2005 Feb 1;8(1):19–32.
- 745 28. American Psychiatric Association. Diagnostic and statistical manual of mental  
746 disorders [Internet]. 5th ed. Washington DC; 2013 [cited 2021 Jun 23]. Available from:  
747 [https://www.ptsd.va.gov/professional/treat/essentials/dsm5\\_ptsd.asp#one](https://www.ptsd.va.gov/professional/treat/essentials/dsm5_ptsd.asp#one)
- 748 29. Paludan-Müller AS, Boesen K, Klerings I, Jørgensen KJ, Munkholm K. Hand cleaning  
749 with ash for reducing the spread of viral and bacterial infections: a rapid review.  
750 *Cochrane Database of Systematic Reviews* [Internet]. 2020 [cited 2021 Aug 21];(4).  
751 Available from: <https://www.cochranelibrary.com/cdsr/doi/10.1002/14651858.CD013597/full>
- 752
- 753 30. United Nations High Commissioner for Refugees. Refugee Data Finder [Internet].  
754 UNHCR. 2021 [cited 2021 Mar 18]. Available from: [https://www.unhcr.org/refugee-](https://www.unhcr.org/refugee-statistics/)  
755 [statistics/](https://www.unhcr.org/refugee-statistics/)
- 756 31. Hamadeh N, Van Rompaey C, Metreau E. New World Bank country classifications by  
757 income level: 2021-2022 [Internet]. *World Bank Blogs*. 2021 [cited 2021 Jul 15].  
758 Available from: [https://blogs.worldbank.org/opendata/new-world-bank-country-](https://blogs.worldbank.org/opendata/new-world-bank-country-classifications-income-level-2021-2022)  
759 [classifications-income-level-2021-2022](https://blogs.worldbank.org/opendata/new-world-bank-country-classifications-income-level-2021-2022)
- 760 32. Hoque BA. Handwashing practices and challenges in Bangladesh. *Int J Environ Health*  
761 *Res*. 2003 Jun;13 Suppl 1:S81-87.
- 762 33. Prajapati P, Desai H, Chandarana C. Hand sanitizers as a preventive measure in  
763 COVID-19 pandemic, its characteristics, and harmful effects: a review. *Journal of the*  
764 *Egyptian Public Health Association*. 2022 Feb 8;97(1):6.

- 765 34. World Health Organization. Advice for the public on COVID-19 – World Health  
766 Organization [Internet]. Advice for the public: Coronavirus disease (COVID-19). 2023  
767 [cited 2023 Apr 16]. Available from: [https://www.who.int/emergencies/diseases/novel-](https://www.who.int/emergencies/diseases/novel-coronavirus-2019/advice-for-public)  
768 [coronavirus-2019/advice-for-public](https://www.who.int/emergencies/diseases/novel-coronavirus-2019/advice-for-public)
- 769 35. Jess RL, Dozier CL. Increasing handwashing in young children: A brief review. *Journal*  
770 *of Applied Behavior Analysis*. 2020;53(3):1219–24.
- 771 36. Substance Abuse and Mental Health Services Administration. Impact of the DSM-IV  
772 to DSM-5 Changes on the National Survey on Drug Use and Health [Internet].  
773 Rockville (MD): Substance Abuse and Mental Health Services Administration (US);  
774 2016 [cited 2021 Jun 23]. (CBHSQ Methodology Report). Available from:  
775 <http://www.ncbi.nlm.nih.gov/books/NBK519697/>
- 776 37. Qian M, Wu Q, Wu P, Hou Z, Liang Y, Cowling BJ, et al. Anxiety levels, precautionary  
777 behaviours and public perceptions during the early phase of the COVID-19 outbreak in  
778 China: a population-based cross-sectional survey. *BMJ Open*. 2020 Oct  
779 1;10(10):e040910.
- 780 38. Goodwin R, Sun S. Early responses to H7N9 in southern Mainland China. *BMC Infect*  
781 *Dis*. 2014 Jan 7;14:8.
- 782 39. Mohammadpour M, Ghorbani V, Khoramnia S, Ahmadi SM, Ghvami M, Maleki M.  
783 Anxiety, Self-Compassion, Gender Differences and COVID-19: Predicting Self-Care  
784 Behaviors and Fear of COVID-19 Based on Anxiety and Self-Compassion with an  
785 Emphasis on Gender Differences. *Iran J Psychiatry*. 2020 Jul;15(3):213–9.
- 786 40. Wang J, Rao N, Han B. Pathways Improving Compliance with Preventive Behaviors  
787 during the Remission Period of the COVID-19 Pandemic. *International Journal of*  
788 *Environmental Research and Public Health*. 2021 Jan;18(7):3512.

- 789 41. Birhanu A, Tiki T, Mekuria M, Yilma D, Melese G, Seifu B. COVID-19-Induced  
790 Anxiety and Associated Factors Among Urban Residents in West Shewa Zone, Central  
791 Ethiopia, 2020. *Psychol Res Behav Manag*. 2021 Feb 9;14:99–108.
- 792 42. Zhang W, Yang X, Zhao J, Yang F, Jia Y, Cui C, et al. Depression and Psychological-  
793 Behavioral Responses Among the General Public in China During the Early Stages of  
794 the COVID-19 Pandemic: Survey Study. *J Med Internet Res*. 2020 Sep 4;22(9):e22227.
- 795 43. Pan Y, Fang Y, Xin M, Dong W, Zhou L, Hou Q, et al. Self-Reported Compliance With  
796 Personal Preventive Measures Among Chinese Factory Workers at the Beginning of  
797 Work Resumption Following the COVID-19 Outbreak: Cross-Sectional Survey Study.  
798 *J Med Internet Res*. 2020 Sep 29;22(9):e22457.
- 799 44. Pan Y, Xin M, Zhang C, Dong W, Fang Y, Wu W, et al. Associations of Mental Health  
800 and Personal Preventive Measure Compliance With Exposure to COVID-19  
801 Information During Work Resumption Following the COVID-19 Outbreak in China:  
802 Cross-Sectional Survey Study. *Journal of Medical Internet Research*. 2020 Oct  
803 8;22(10):e22596.
- 804 45. Action contre la Faim. 1 + 1 = 3: How to Integrate WASH and MHCP Activities for  
805 Better Humanitarian Projects [Internet]. France: Action contre la Faim; 2013 Dec [cited  
806 2021 Aug 27] p. 74. Available from:  
807 [https://www.actioncontrelafaim.org/publication/acf-international-manual-1-1-3-how-](https://www.actioncontrelafaim.org/publication/acf-international-manual-1-1-3-how-to-integrate-wash-and-mhcp-activities-for-better-humanitarian-projects/)  
808 [to-integrate-wash-and-mhcp-activities-for-better-humanitarian-projects/](https://www.actioncontrelafaim.org/publication/acf-international-manual-1-1-3-how-to-integrate-wash-and-mhcp-activities-for-better-humanitarian-projects/)
- 809 46. Slekiene J, Mosler HJ. Does poor mental health change the influence of interventions  
810 on handwashing in a vulnerable population of rural Malawi? The key role of emotions.  
811 *Journal of Water, Sanitation and Hygiene for Development*. 2020 Dec 30;11(3):350–  
812 61.

- 813 47. Betancourt TS, Brennan RT, Vinck P, VanderWeele TJ, Spencer-Walters D, Jeong J,  
814 et al. Associations between Mental Health and Ebola-Related Health Behaviors: A  
815 Regionally Representative Cross-sectional Survey in Post-conflict Sierra Leone. *PLoS*  
816 *Med.* 2016 Aug;13(8):e1002073.
- 817 48. Wang C, Pan R, Wan X, Tan Y, Xu L, McIntyre RS, et al. A longitudinal study on the  
818 mental health of general population during the COVID-19 epidemic in China. *Brain,*  
819 *Behavior, and Immunity.* 2020 Jul 1;87:40–8.
- 820 49. Wang C, Pan R, Wan X, Tan Y, Xu L, Ho CS, et al. Immediate Psychological  
821 Responses and Associated Factors during the Initial Stage of the 2019 Coronavirus  
822 Disease (COVID-19) Epidemic among the General Population in China. *Int J Environ*  
823 *Res Public Health.* 2020 Mar 6;17(5):E1729.
- 824 50. Assefa ZM, Haile TG, Wazema DH, Tafese WT, Berrie FW, Beketie ED, et al. Mental  
825 Health Disorders During COVID-19 Pandemic Among Southwest Ethiopia University  
826 Students: An Institutional-Based Cross-Sectional Study. *SAGE Open Nurs.*  
827 2021;7:23779608211064376.
- 828 51. Ruiz-Frutos C, Palomino-Baldeón JC, Ortega-Moreno M, Villavicencio-Guardia M del  
829 C, Dias A, Bernardes JM, et al. Effects of the COVID-19 Pandemic on Mental Health  
830 in Peru: Psychological Distress. *Healthcare.* 2021 Jun;9(6):691.
- 831 52. Slekiene J, Chidziwisano K, Morse T. Does Poor Mental Health Impair the  
832 Effectiveness of Complementary Food Hygiene Behavior Change Intervention in Rural  
833 Malawi? *International Journal of Environmental Research and Public Health.* 2022  
834 Jan;19(17):10589.
- 835 53. Ambelu A, Birhanu Z, Yitayih Y, Kebede Y, Mecha M, Abafita J, et al. Psychological  
836 distress during the COVID-19 pandemic in Ethiopia: an online cross-sectional study to



- 837 identify the need for equal attention of intervention. *Annals of General Psychiatry*. 2021  
838 Mar 25;20(1):22.
- 839 54. United Nations High Commissioner for Refugees. Emerging Practices: Mental health  
840 and psychosocial support in refugee operations during the COVID-19 pandemic -  
841 World [Internet]. Geneva: United Nations High Commissioner for Refugees; 2020 Jun  
842 [cited 2021 Aug 27] p. 16. Available from: [https://reliefweb.int/report/world/emerging-](https://reliefweb.int/report/world/emerging-practices-mental-health-and-psychosocial-support-refugee-operations-during)  
843 [practices-mental-health-and-psychosocial-support-refugee-operations-during](https://reliefweb.int/report/world/emerging-practices-mental-health-and-psychosocial-support-refugee-operations-during)
- 844 55. Clomén D, Horn R, Osorio M, Powell M, Rydell AF, Sejberg Z. “The greatest need  
845 was to be listened to”: The importance of mental health and psychosocial support during  
846 COVID-19 [Internet]. Geneva: International Committee of the Red Cross and  
847 International Federation of Red Cross and Red Crescent Societies; 2020 Oct [cited 2021  
848 Aug 27] p. 23. Available from: [https://pscentre.org/?resource=the-greatest-need-was-](https://pscentre.org/?resource=the-greatest-need-was-to-be-listened-to-the-importance-of-mental-health-and-psychosocial-support-during-covid-19&selected=single-resource)  
849 [to-be-listened-to-the-importance-of-mental-health-and-psychosocial-support-during-](https://pscentre.org/?resource=the-greatest-need-was-to-be-listened-to-the-importance-of-mental-health-and-psychosocial-support-during-covid-19&selected=single-resource)  
850 [covid-19&selected=single-resource](https://pscentre.org/?resource=the-greatest-need-was-to-be-listened-to-the-importance-of-mental-health-and-psychosocial-support-during-covid-19&selected=single-resource)
- 851 56. Wang Q, Mo PKH, Song B, Di JL, Zhou FR, Zhao J, et al. Mental health and preventive  
852 behaviour of pregnant women in China during the early phase of the COVID-19 period.  
853 *Infectious Diseases of Poverty*. 2021 Mar 24;10(1):37.
- 854 57. Ni Z, Lebowitz ER, Zou Z, Wang H, Liu H, Shrestha R, et al. Response to the COVID-  
855 19 Outbreak in Urban Settings in China. *J Urban Health*. 2021 Feb;98(1):41–52.
- 856 58. Liu X, Luo WT, Li Y, Li CN, Hong ZS, Chen HL, et al. Psychological status and  
857 behavior changes of the public during the COVID-19 epidemic in China. *Infectious*  
858 *Diseases of Poverty*. 2020 May 29;9(1):58.
- 859 59. Liu J, Tong Y, Li S, Tian Z, He L, Zheng J. Compliance with COVID-19-preventive  
860 behaviours among employees returning to work in the post-epidemic period. *BMC*  
861 *Public Health*. 2022 Feb 21;22(1):369.

- 862 60. Zangana A, Shabila N, Heath T, White S. The determinants of handwashing behaviour  
863 among internally displaced women in two camps in the Kurdistan Region of Iraq. PLOS  
864 ONE. 2020 May 8;15(5):e0231694.
- 865 61. White S, Heath T, Ibrahim WK, Ihsan D, Blanchet K, Curtis V, et al. How is hygiene  
866 behaviour affected by conflict and displacement? A qualitative case study in Northern  
867 Iraq. PLOS ONE. 2022 Mar 3;17(3):e0264434.
- 868 62. Usher K, Jackson D, Durkin J, Gyamfi N, Bhullar N. Pandemic-related behaviours and  
869 psychological outcomes; A rapid literature review to explain COVID-19 behaviours.  
870 International Journal of Mental Health Nursing. 2020;29(6):1018–34.
- 871 63. Perkins AM, Corr PJ. Anxiety as an adaptive emotion. In: The positive side of negative  
872 emotions. New York, NY, US: The Guilford Press; 2014. p. 37–54.
- 873 64. Harper CA, Satchell LP, Fido D, Latzman RD. Functional Fear Predicts Public Health  
874 Compliance in the COVID-19 Pandemic. Int J Ment Health Addict. 2020 Apr 27;1–14.
- 875 65. Lin CY, Lin YL. Anxiety and depression of general population in the early phase of  
876 COVID-19 pandemic: A systematic review of cross-sectional studies. Arch Clin  
877 Psychiatry (São Paulo). 2021;47:199–208.
- 878 66. Slekiene J, Mosler HJ. Poor mental health impairs WASH behaviors: Including people  
879 with poor mental health in WASH interventions. [Internet]. Dübendorf, Switzerland:  
880 Eawag, Swiss Federal Institute of 2 Aquatic Science and Technology; 2019 Oct p. 2.  
881 (Intervention Fact Sheet 9: Data-Driven Behavior Change). Available from:  
882 <https://www.ranamosler.com/mental-health>
- 883 67. Schiavo R, May Leung M, Brown M. Communicating risk and promoting disease  
884 mitigation measures in epidemics and emerging disease settings. Pathog Glob Health.  
885 2014 Mar;108(2):76–94.

- 886 68. Coetzee BJ, Kagee A. Structural barriers to adhering to health behaviours in the context  
887 of the COVID-19 crisis: Considerations for low- and middle-income countries. *Global*  
888 *Public Health*. 2020 Aug 2;15(8):1093–102.
- 889 69. Brickhill-Atkinson M, Hauck FR. Impact of COVID-19 on Resettled Refugees. *Prim*  
890 *Care*. 2021 Mar;48(1):57–66.
- 891 70. Salari N, Hosseini-Far A, Jalali R, Vaisi-Raygani A, Rasoulpoor S, Mohammadi M,  
892 et al. Prevalence of stress, anxiety, depression among the general population during the  
893 COVID-19 pandemic: a systematic review and meta-analysis. *Globalization and*  
894 *Health*. 2020 Jul 6;16(1):57.
- 895 71. Blum LS, Yemweni A, Trinies V, Kambere M, Tolani F, Allen JV, et al. Programmatic  
896 implications for promotion of handwashing behavior in an internally displaced persons  
897 camp in North Kivu, Democratic Republic of Congo. *Conflict and Health*. 2019 Nov  
898 20;13(1):54.
- 899 72. Kramer ADI, Guillory JE, Hancock JT. Experimental evidence of massive-scale  
900 emotional contagion through social networks. *PNAS*. 2014 Jun 17;111(24):8788–90.
- 901 73. Clarke L. Panic: Myth or Reality? *Contexts*. 2002 Aug 1;1(3):21–6.
- 902 74. Wang X, Cai L, Qian J, Peng J. Social support moderates stress effects on depression.  
903 *Int J Ment Health Syst*. 2014 Jan 1;8(1):41.
- 904 75. Fung ICH, Cairncross S. How often do you wash your hands? A review of studies of  
905 hand-washing practices in the community during and after the SARS outbreak in 2003.  
906 *Int J Environ Health Res*. 2007 Jun;17(3):161–83.
- 907 76. Maulik PK, Eaton WW, Bradshaw CP. The Role of Social Network and Support in  
908 Mental Health Service Use: Findings From the Baltimore ECA Study. *PS*. 2009 Sep  
909 1;60(9):1222–9.

- 910 77. Folkman S, Chesney MA, Pollack L, Phillips C. Stress, coping, and high-risk sexual  
911 behavior. *Health Psychology*. 1992;11(4):218–22.
- 912 78. Ramos M, Benelli P, Irvine E, Watson J. WASH in Emergencies Problem Exploration  
913 Report: Handwashing [Internet]. Elhra and Humanitarian Innovation Fund; 2016 Jan  
914 [cited 2021 Aug 28]. Available from:  
915 <https://www.elrha.org/researchdatabase/handwashing/>
- 916 79. Moore A, van Loenhout JAF, de Almeida MM, Smith P, Guha-Sapir D. Measuring  
917 mental health burden in humanitarian settings: a critical review of assessment tools.  
918 *Glob Health Action*. 13(1):1783957.
- 919 80. Spitzer RL, Kroenke K, Williams JBW, Löwe B. A Brief Measure for Assessing  
920 Generalized Anxiety Disorder: The GAD-7. *Archives of Internal Medicine*. 2006 May  
921 22;166(10):1092–7.
- 922 81. Bian C, Li C, Duan Q, Wu H. Reliability and validity of patient health questionnaire:  
923 Depressive syndrome module for outpatients. *SRE*. 2011 Jan 18;6(2):278–82.
- 924 82. Grant M, Booth A. A typology of reviews: An analysis of 14 review types and  
925 associated methodologies. *Health information and libraries journal*. 2009 Jul 1;26:91–  
926 108.
- 927 83. Ratheesh, A., Alvarez-Jimenez, M. The future of digital mental health in the post-  
928 pandemic world: Evidence-based, blended, responsive and implementable. *Australian  
929 & New Zealand Journal of Psychiatry* 2022;56(2):107-109.  
930 doi:10.1177/00048674211070984

931

## 932 **Supporting Information**

933 **S1 Table: Detailed Search Terms**

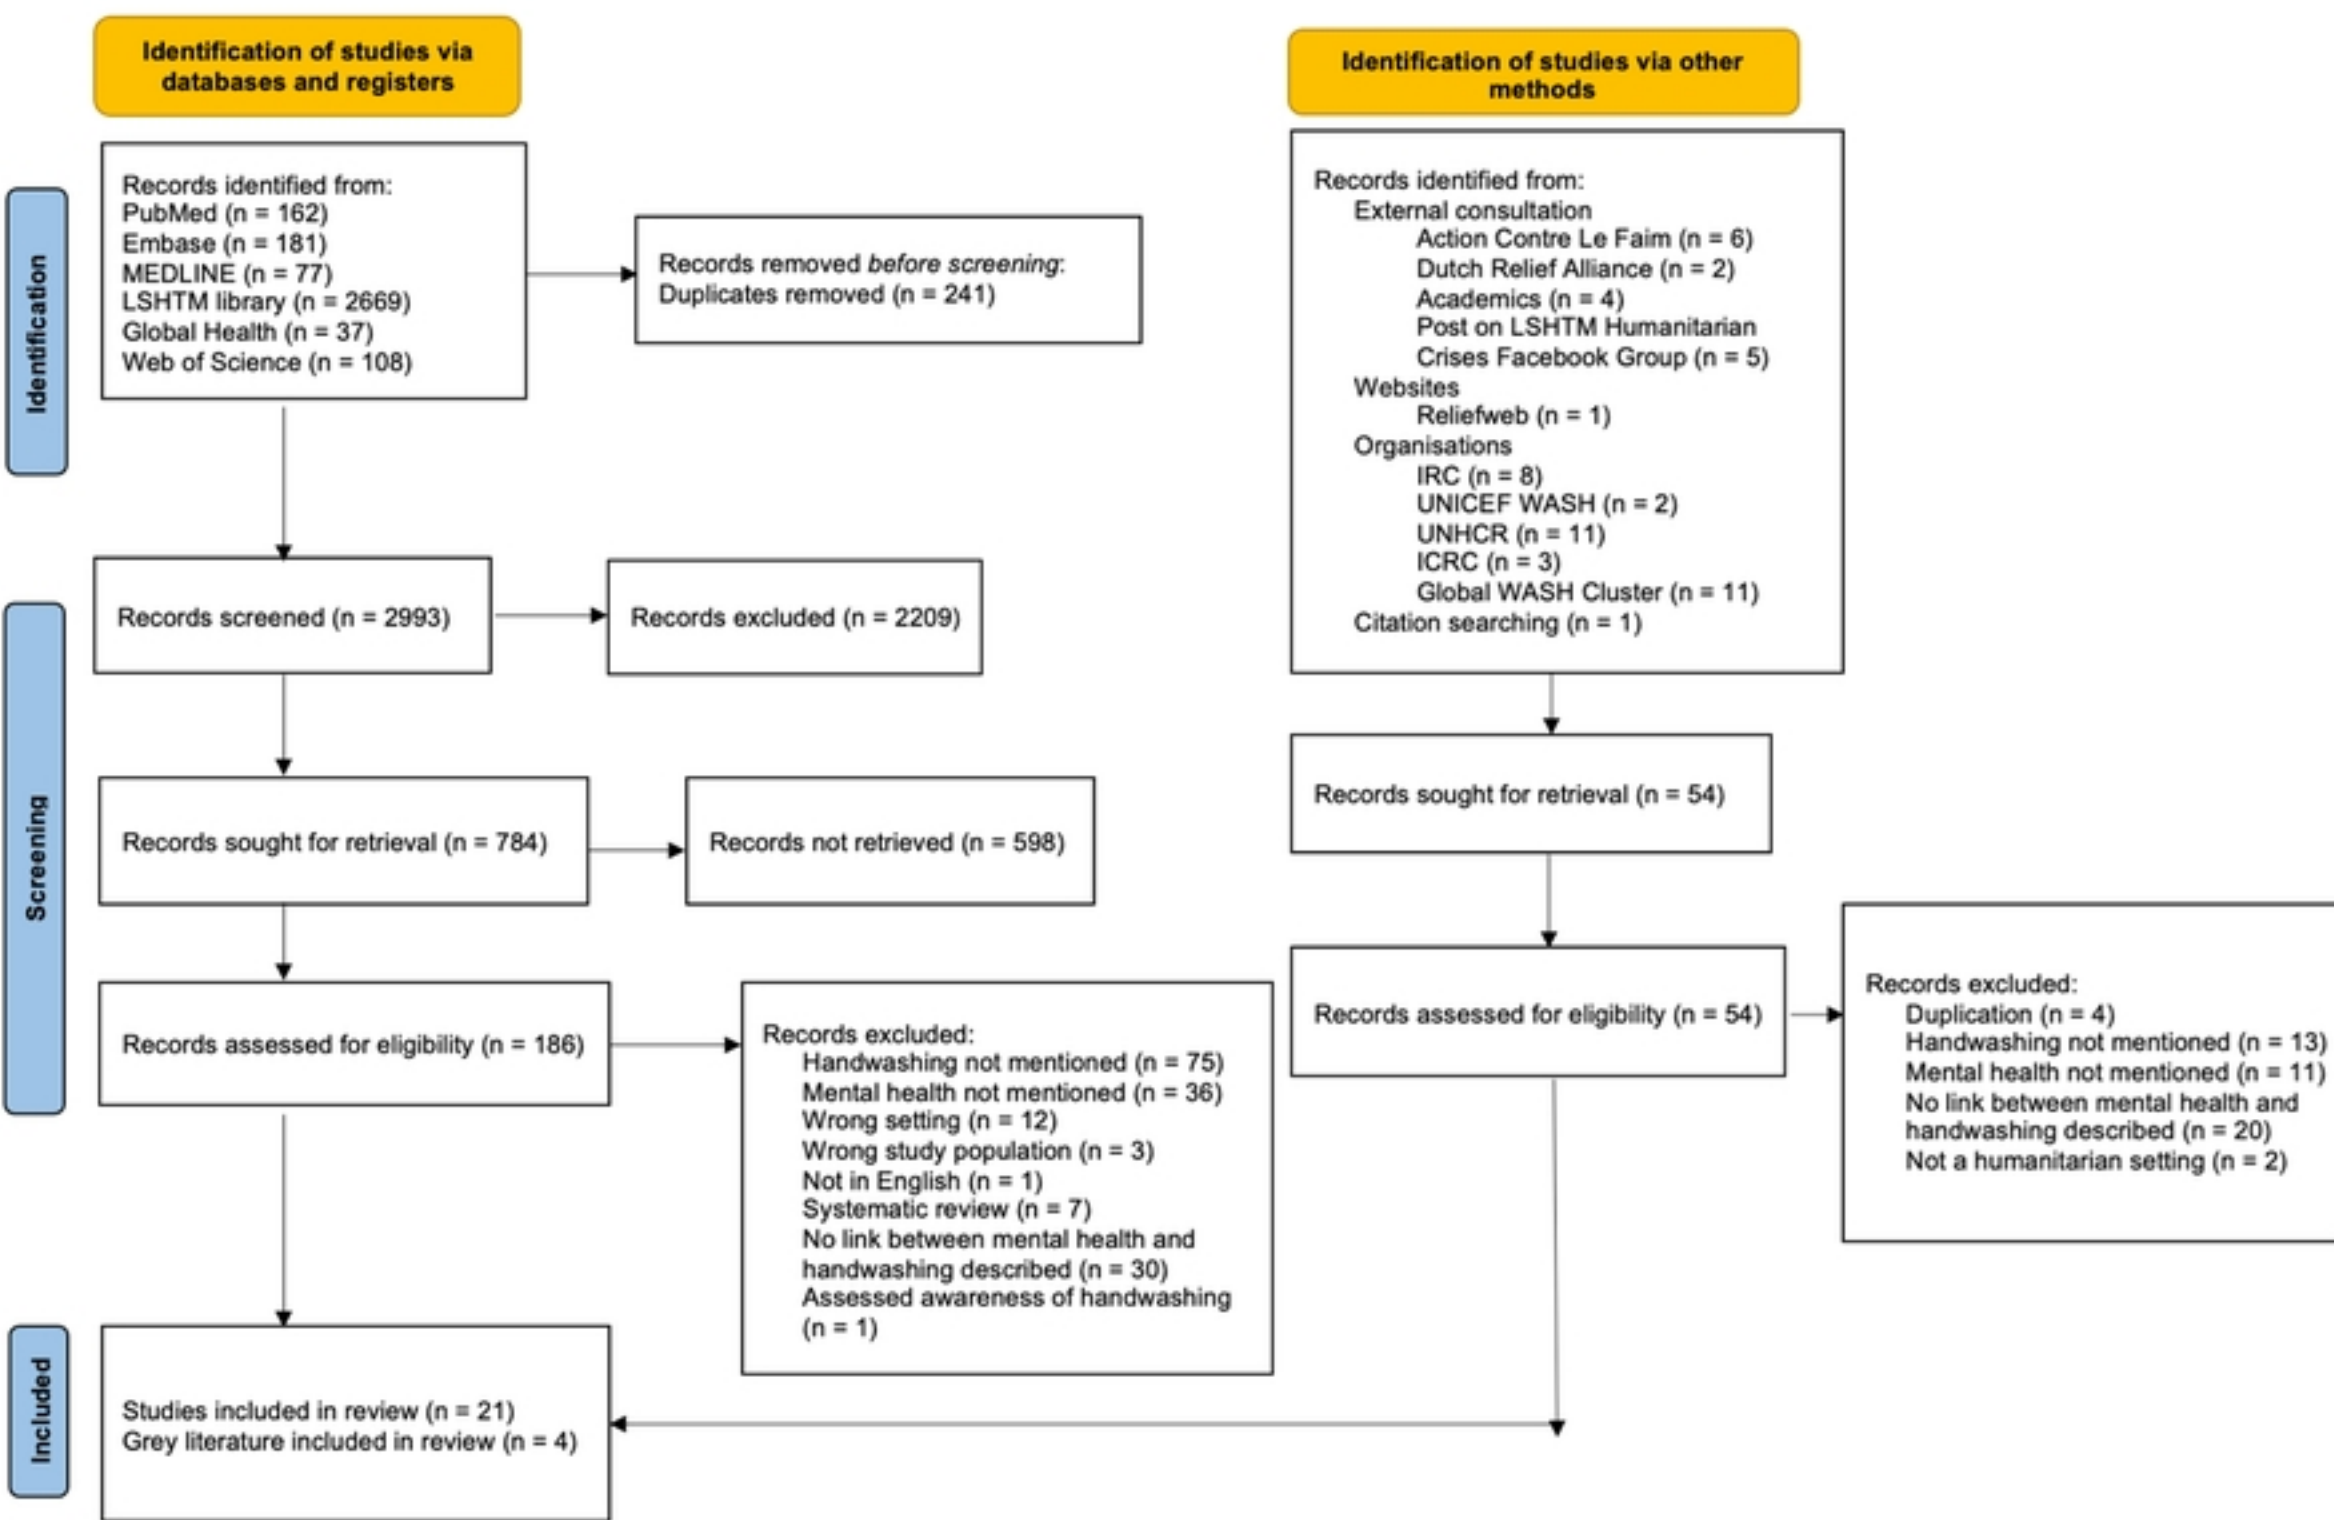

Figure 1
